# Supplementary material
Source: MDPI journal article supplement (https://www.mdpi.com/2306-5729/5/1/6)
Supplement: s1 [file s1]

## Annex VII

Germination indices were computed from data in Annex III for cumulative germination of rice (cv. Americano 1600) through time (reported from Piacco, 1954).

There are two factors, '**temp**' (the temperature at which seeds were soaked in water for 5 h before testing germination at 30 °C) and '**plate**' (the Petri dish replicate), and three indices as response variables: '**MGT**', the mean germination time; '**MGR**', the mean germination rate; '**CUG**', the coefficient of uniformity of germination.

| <b>temp</b> | <b>plate</b> | <b>MGT</b> | <b>MGR</b> | <b>CUG</b> |
|-------------|--------------|------------|------------|------------|
| 20          | 1            | 3.16       | 0.316      | 3.31       |
| 20          | 2            | 3.30       | 0.303      | 3.61       |
| 20          | 3            | 3.27       | 0.306      | 4.18       |
| 20          | 4            | 3.29       | 0.304      | 3.30       |
| 20          | 5            | 3.21       | 0.311      | 3.37       |
| 20          | 6            | 3.22       | 0.310      | 4.12       |
| 30          | 1            | 3.08       | 0.325      | 4.19       |
| 30          | 2            | 3.01       | 0.332      | 5.06       |
| 30          | 3            | 3.07       | 0.326      | 3.79       |
| 30          | 4            | 3.15       | 0.317      | 1.66       |
| 30          | 5            | 3.08       | 0.325      | 3.85       |
| 30          | 6            | 2.97       | 0.336      | 4.61       |
| 40          | 1            | 3.01       | 0.332      | 1.98       |
| 40          | 2            | 2.91       | 0.343      | 4.12       |
| 40          | 3            | 2.94       | 0.341      | 1.84       |
| 40          | 4            | 2.92       | 0.343      | 2.26       |
| 40          | 5            | 3.02       | 0.331      | 1.69       |
| 40          | 6            | 3.01       | 0.333      | 1.59       |

## References

Piacco R. (1954). Ricerche sui metodi di analisi delle sementi di riso (*Oryza sativa* L.) nei riguardi della facoltà germinativa. *Annali della Stazione Sperimentale di Risicoltura e delle Colture Irrigue di Vercelli* 2: 111-179.
