# Supplementary material
Source: MDPI journal article supplement (https://www.mdpi.com/2306-5729/5/1/6)
Supplement: s1 [file s1]

## Annex V

Data from Sanoubar et al. (2018) for cumulative germination of three herb species through time (a subset of the original data is utilized here). Seeds were germinated at 22 °C on small trays with peat moss substrate in two growth chambers illuminated with either LED or fluorescent light featuring similar photosynthetic photon flux density. Seeds were considered germinated when the emerging radicle was  $\geq 2$ mm. Germination tests were truncated after 20 days.

There are four factors, 'light\_source' 'species', 'plate' and 'time' of observation (in days), and a single response variable, 'germ', the cumulative germination count after the number of days indicated in the 'time' column. Factor 'plate' is the Petri dish replicate (whose coding is repeated for each treatment), 'n' is the total number of seeds sown in each plate.

| light_source | species                   | plate | time | n  | germ |
|--------------|---------------------------|-------|------|----|------|
| neon         | <i>Atriplex hortensis</i> | a     | 6    | 50 | 2    |
| neon         | <i>Atriplex hortensis</i> | b     | 6    | 50 | 2    |
| neon         | <i>Atriplex hortensis</i> | a     | 9    | 50 | 3    |
| neon         | <i>Atriplex hortensis</i> | b     | 9    | 50 | 4    |
| neon         | <i>Atriplex hortensis</i> | a     | 13   | 50 | 3    |
| neon         | <i>Atriplex hortensis</i> | b     | 13   | 50 | 5    |
| neon         | <i>Atriplex hortensis</i> | a     | 16   | 50 | 6    |
| neon         | <i>Atriplex hortensis</i> | b     | 16   | 50 | 6    |
| neon         | <i>Atriplex hortensis</i> | a     | 20   | 50 | 9    |
| neon         | <i>Atriplex hortensis</i> | b     | 20   | 50 | 7    |
| neon         | <i>Chenopodium quinoa</i> | a     | 6    | 50 | 7    |
| neon         | <i>Chenopodium quinoa</i> | b     | 6    | 50 | 5    |
| neon         | <i>Chenopodium quinoa</i> | a     | 9    | 50 | 12   |
| neon         | <i>Chenopodium quinoa</i> | b     | 9    | 50 | 8    |
| neon         | <i>Chenopodium quinoa</i> | a     | 13   | 50 | 14   |
| neon         | <i>Chenopodium quinoa</i> | b     | 13   | 50 | 10   |
| neon         | <i>Chenopodium quinoa</i> | a     | 16   | 50 | 16   |
| neon         | <i>Chenopodium quinoa</i> | b     | 16   | 50 | 12   |
| neon         | <i>Chenopodium quinoa</i> | a     | 20   | 50 | 17   |
| neon         | <i>Chenopodium quinoa</i> | b     | 20   | 50 | 13   |
| neon         | <i>Sanguisorba minor</i>  | a     | 6    | 80 | 9    |
| neon         | <i>Sanguisorba minor</i>  | b     | 6    | 80 | 8    |
| neon         | <i>Sanguisorba minor</i>  | a     | 9    | 80 | 29   |
| neon         | <i>Sanguisorba minor</i>  | b     | 9    | 80 | 25   |
| neon         | <i>Sanguisorba minor</i>  | a     | 13   | 80 | 39   |
| neon         | <i>Sanguisorba minor</i>  | b     | 13   | 80 | 34   |
| neon         | <i>Sanguisorba minor</i>  | a     | 16   | 80 | 51   |
| neon         | <i>Sanguisorba minor</i>  | b     | 16   | 80 | 42   |
| neon         | <i>Sanguisorba minor</i>  | a     | 20   | 80 | 55   |
| neon         | <i>Sanguisorba minor</i>  | b     | 20   | 80 | 45   |
| led          | <i>Atriplex hortensis</i> | a     | 6    | 50 | 5    |
| led          | <i>Atriplex hortensis</i> | b     | 6    | 50 | 7    |
| led          | <i>Atriplex hortensis</i> | a     | 9    | 50 | 11   |
| led          | <i>Atriplex hortensis</i> | b     | 9    | 50 | 11   |
| led          | <i>Atriplex hortensis</i> | a     | 13   | 50 | 14   |
| led          | <i>Atriplex hortensis</i> | b     | 13   | 50 | 14   |

|     |                           |   |    |    |    |
|-----|---------------------------|---|----|----|----|
| led | <i>Atriplex hortensis</i> | a | 16 | 50 | 18 |
| led | <i>Atriplex hortensis</i> | b | 16 | 50 | 16 |
| led | <i>Atriplex hortensis</i> | a | 20 | 50 | 18 |
| led | <i>Atriplex hortensis</i> | b | 20 | 50 | 17 |
| led | <i>Chenopodium quinoa</i> | a | 6  | 50 | 24 |
| led | <i>Chenopodium quinoa</i> | b | 6  | 50 | 27 |
| led | <i>Chenopodium quinoa</i> | a | 9  | 50 | 34 |
| led | <i>Chenopodium quinoa</i> | b | 9  | 50 | 39 |
| led | <i>Chenopodium quinoa</i> | a | 13 | 50 | 37 |
| led | <i>Chenopodium quinoa</i> | b | 13 | 50 | 43 |
| led | <i>Chenopodium quinoa</i> | a | 16 | 50 | 40 |
| led | <i>Chenopodium quinoa</i> | b | 16 | 50 | 44 |
| led | <i>Chenopodium quinoa</i> | a | 20 | 50 | 41 |
| led | <i>Chenopodium quinoa</i> | b | 20 | 50 | 45 |
| led | <i>Sanguisorba minor</i>  | a | 6  | 80 | 35 |
| led | <i>Sanguisorba minor</i>  | b | 6  | 80 | 38 |
| led | <i>Sanguisorba minor</i>  | a | 9  | 80 | 60 |
| led | <i>Sanguisorba minor</i>  | b | 9  | 80 | 60 |
| led | <i>Sanguisorba minor</i>  | a | 13 | 80 | 70 |
| led | <i>Sanguisorba minor</i>  | b | 13 | 80 | 72 |
| led | <i>Sanguisorba minor</i>  | a | 16 | 80 | 72 |
| led | <i>Sanguisorba minor</i>  | b | 16 | 80 | 73 |
| led | <i>Sanguisorba minor</i>  | a | 20 | 80 | 74 |
| led | <i>Sanguisorba minor</i>  | b | 20 | 80 | 74 |

## References

Sanoubar R., Calone R., Noli E. and Barbanti L. (2018). Data on seed germination using LED versus fluorescent light under growth chamber conditions. *Data in Brief* 19:594-600.
