# Supplementary material
Source: MDPI journal article supplement (https://www.mdpi.com/2306-5729/5/1/6)
Supplement: s1 [file s1]

Archive with 9 entries (9 files):
- Annex V.pdf
- Annex VI.pdf
- Annex VII.pdf
- Annex VIII.pdf
- Annex I.pdf
- Annex II.pdf
- Annex III.pdf
- Annex IV.pdf
- Annex IX.pdf
