# Supplementary material
Source: MDPI journal article supplement (https://www.mdpi.com/2306-5729/5/1/6)
Supplement: s1 [file s1 › Annex I.pdf]

## Annex I

Data from Gianinetti et al. (2018) for rice germination (FGP). Although the rice dispersal unit is a spikelet with a single floret, in this example dehulled caryopses (i.e., the hull case was removed from the spikelets) were used as ‘seeds’, and ‘grains’ are intended with the same broad meaning. Eight variables are listed: ‘**grain**’ is the caryopsis colour type (red, ‘r’, and white, ‘w’, grains are compared), ‘**cv**’ is the cultivar (cultivated variety) of rice (three cultivars with red grain are contrasted with three cultivars with white grain), ‘**trt**’ is the treatment (seeds were either infected with a fungus, ‘+epic’, or not, ‘Ctr’, prior to the germination test), ‘**expd**’ is the duration of fungal infection before testing germination (it depended onto the time the fungus required to infect all the seeds in two full experiment repeats; thus it also corresponds to the experiment repeat), ‘**plate**’ is the identity code of each plate (unique within the whole experiment), ‘**n**’ is the total number of seeds sown in each plate (n=20, always), ‘**germ**’ is the number of seeds germinated by the end of the test (i.e., these are final germination counts), ‘**p**’ is the proportion of seeds that germinated within each plate by the end of the test. There are 78 aggregate observations (i.e. plates), corresponding to 1560 seeds.

|    | <b>grain</b> | <b>cv</b>   | <b>trt</b> | <b>expd</b> | <b>plate</b> | <b>n</b> | <b>germ</b> | <b>p</b> |
|----|--------------|-------------|------------|-------------|--------------|----------|-------------|----------|
| 1  | w            | Perla       | Ctr        | 14d         | PC41         | 20       | 19          | 0.95     |
| 2  | w            | Perla       | Ctr        | 14d         | PC42         | 20       | 19          | 0.95     |
| 3  | w            | Perla       | +epic      | 14d         | P+41         | 20       | 6           | 0.3      |
| 4  | w            | Perla       | +epic      | 14d         | P+42         | 20       | 4           | 0.2      |
| 5  | w            | Perla       | +epic      | 14d         | P+43         | 20       | 6           | 0.3      |
| 6  | w            | Perla       | +epic      | 14d         | P+44         | 20       | 5           | 0.25     |
| 7  | w            | Perla       | Ctr        | 17d         | PC71         | 20       | 19          | 0.95     |
| 8  | w            | Perla       | Ctr        | 17d         | PC72         | 20       | 18          | 0.9      |
| 9  | w            | Perla       | Ctr        | 17d         | PC73         | 20       | 20          | 1        |
| 10 | w            | Perla       | +epic      | 17d         | P+71         | 20       | 7           | 0.35     |
| 11 | w            | Perla       | +epic      | 17d         | P+72         | 20       | 8           | 0.4      |
| 12 | w            | Perla       | +epic      | 17d         | P+73         | 20       | 4           | 0.2      |
| 13 | w            | Perla       | +epic      | 17d         | P+74         | 20       | 3           | 0.15     |
| 14 | r            | Perla Rosso | Ctr        | 14d         | PRC41        | 20       | 20          | 1        |
| 15 | r            | Perla Rosso | Ctr        | 14d         | PRC42        | 20       | 20          | 1        |
| 16 | r            | Perla Rosso | +epic      | 14d         | PR+41        | 20       | 20          | 1        |
| 17 | r            | Perla Rosso | +epic      | 14d         | PR+42        | 20       | 20          | 1        |
| 18 | r            | Perla Rosso | +epic      | 14d         | PR+43        | 20       | 20          | 1        |
| 19 | r            | Perla Rosso | +epic      | 14d         | PR+44        | 20       | 20          | 1        |
| 20 | r            | Perla Rosso | Ctr        | 17d         | PRC71        | 20       | 18          | 0.9      |
| 21 | r            | Perla Rosso | Ctr        | 17d         | PRC72        | 20       | 20          | 1        |
| 22 | r            | Perla Rosso | Ctr        | 17d         | PRC73        | 20       | 20          | 1        |
| 23 | r            | Perla Rosso | +epic      | 17d         | PR+71        | 20       | 14          | 0.7      |
| 24 | r            | Perla Rosso | +epic      | 17d         | PR+72        | 20       | 15          | 0.75     |
| 25 | r            | Perla Rosso | +epic      | 17d         | PR+73        | 20       | 17          | 0.85     |
| 26 | r            | Perla Rosso | +epic      | 17d         | PR+74        | 20       | 17          | 0.85     |
| 27 | w            | Augusto     | Ctr        | 14d         | AC41         | 20       | 20          | 1        |
| 28 | w            | Augusto     | Ctr        | 14d         | AC42         | 20       | 20          | 1        |
| 29 | w            | Augusto     | +epic      | 14d         | A+41         | 20       | 16          | 0.8      |
| 30 | w            | Augusto     | +epic      | 14d         | A+42         | 20       | 17          | 0.85     |
| 31 | w            | Augusto     | +epic      | 14d         | A+43         | 20       | 18          | 0.9      |
| 32 | w            | Augusto     | +epic      | 14d         | A+44         | 20       | 18          | 0.9      |
| 33 | w            | Augusto     | Ctr        | 17d         | AC71         | 20       | 12          | 0.6      |

|    |   |               |       |     |       |    |    |      |
|----|---|---------------|-------|-----|-------|----|----|------|
| 34 | w | Augusto       | Ctr   | 17d | AC72  | 20 | 15 | 0.75 |
| 35 | w | Augusto       | Ctr   | 17d | AC73  | 20 | 16 | 0.8  |
| 36 | w | Augusto       | +epic | 17d | A+71  | 20 | 7  | 0.35 |
| 37 | w | Augusto       | +epic | 17d | A+72  | 20 | 10 | 0.5  |
| 38 | w | Augusto       | +epic | 17d | A+73  | 20 | 10 | 0.5  |
| 39 | w | Augusto       | +epic | 17d | A+74  | 20 | 9  | 0.45 |
| 40 | r | Augusto Rosso | Ctr   | 14d | ARC41 | 20 | 20 | 1    |
| 41 | r | Augusto Rosso | Ctr   | 14d | ARC42 | 20 | 20 | 1    |
| 42 | r | Augusto Rosso | +epic | 14d | AR+41 | 20 | 20 | 1    |
| 43 | r | Augusto Rosso | +epic | 14d | AR+42 | 20 | 20 | 1    |
| 44 | r | Augusto Rosso | +epic | 14d | AR+43 | 20 | 20 | 1    |
| 45 | r | Augusto Rosso | +epic | 14d | AR+44 | 20 | 20 | 1    |
| 46 | r | Augusto Rosso | Ctr   | 17d | ARC71 | 20 | 20 | 1    |
| 47 | r | Augusto Rosso | Ctr   | 17d | ARC72 | 20 | 19 | 0.95 |
| 48 | r | Augusto Rosso | Ctr   | 17d | ARC73 | 20 | 20 | 1    |
| 49 | r | Augusto Rosso | +epic | 17d | AR+71 | 20 | 20 | 1    |
| 50 | r | Augusto Rosso | +epic | 17d | AR+72 | 20 | 17 | 0.85 |
| 51 | r | Augusto Rosso | +epic | 17d | AR+73 | 20 | 19 | 0.95 |
| 52 | r | Augusto Rosso | +epic | 17d | AR+74 | 20 | 19 | 0.95 |
| 53 | w | Koral         | Ctr   | 14d | KC41  | 20 | 20 | 1    |
| 54 | w | Koral         | Ctr   | 14d | KC42  | 20 | 18 | 0.9  |
| 55 | w | Koral         | +epic | 14d | K+41  | 20 | 16 | 0.8  |
| 56 | w | Koral         | +epic | 14d | K+42  | 20 | 18 | 0.9  |
| 57 | w | Koral         | +epic | 14d | K+43  | 20 | 17 | 0.85 |
| 58 | w | Koral         | +epic | 14d | K+44  | 20 | 17 | 0.85 |
| 59 | w | Koral         | Ctr   | 17d | KC71  | 20 | 17 | 0.85 |
| 60 | w | Koral         | Ctr   | 17d | KC72  | 20 | 13 | 0.65 |
| 61 | w | Koral         | Ctr   | 17d | KC73  | 20 | 12 | 0.6  |
| 62 | w | Koral         | +epic | 17d | K+71  | 20 | 7  | 0.35 |
| 63 | w | Koral         | +epic | 17d | K+72  | 20 | 12 | 0.6  |
| 64 | w | Koral         | +epic | 17d | K+73  | 20 | 6  | 0.3  |
| 65 | w | Koral         | +epic | 17d | K+74  | 20 | 13 | 0.65 |
| 66 | r | Koral Rosso   | Ctr   | 14d | KRC41 | 20 | 20 | 1    |
| 67 | r | Koral Rosso   | Ctr   | 14d | KRC42 | 20 | 20 | 1    |
| 68 | r | Koral Rosso   | +epic | 14d | KR+41 | 20 | 20 | 1    |
| 69 | r | Koral Rosso   | +epic | 14d | KR+42 | 20 | 20 | 1    |
| 70 | r | Koral Rosso   | +epic | 14d | KR+43 | 20 | 18 | 0.9  |
| 71 | r | Koral Rosso   | +epic | 14d | KR+44 | 20 | 19 | 0.95 |
| 72 | r | Koral Rosso   | Ctr   | 17d | KRC71 | 20 | 16 | 0.8  |
| 73 | r | Koral Rosso   | Ctr   | 17d | KRC72 | 20 | 19 | 0.95 |
| 74 | r | Koral Rosso   | Ctr   | 17d | KRC73 | 20 | 16 | 0.8  |
| 75 | r | Koral Rosso   | +epic | 17d | KR+71 | 20 | 17 | 0.85 |
| 76 | r | Koral Rosso   | +epic | 17d | KR+72 | 20 | 18 | 0.9  |
| 77 | r | Koral Rosso   | +epic | 17d | KR+73 | 20 | 16 | 0.8  |
| 78 | r | Koral Rosso   | +epic | 17d | KR+74 | 20 | 13 | 0.65 |

## References

Gianinetti A., Finocchiaro F., Maisenti F., Kouongni Satsap D., Morcia C., Ghizzoni R. and Terzi V. (2018). The caryopsis of red-grained rice has enhanced resistance to fungal attack. *Journal of Fungi* 4: 71.
