# Supplementary material
Source: MDPI journal article supplement (https://www.mdpi.com/2306-5729/5/1/6)
Supplement: s1 [file s1 › Annex III.pdf]

### Annex III

Data from Piacco (1954) for cumulative germination of rice (cv. Americano 1600) through time (a subset of the original data is utilized here). The soaking temperature prior to the germination test is the fixed factor under evaluation. The rice dispersal units, i.e. spikelets, were used as ‘seeds’. A seed was considered to have germinated when both the shoot and the radicle were 5 mm in length (this is not recommended as a valid criterion for scientific germination studies, because it delays recording of germination of about one day; such criterion may be sensible when ‘germination’ is rather intended as ‘seedling establishment capability’). Cumulative germination was sequentially assessed for every plate at twelve non-uniform times up to 7 d, when it was assumed to have completed.

Depending on the statistical approach, data can be arranged in two ways: for multivariate analysis, germination responses are in columns, one for every observation time (germination values recorded at different times are therefore considered diverse response variables); for univariate analysis of germination, time of observation is introduced as an additional factor and timepoints are then considered time levels, thus that a single response variable is considered and all germination counts are arranged in a single column.

Three columns are common to the two diverse arrangements; ‘temp’ is the temperature at which seeds were soaked in water for 5 h before testing germination at 30 °C, ‘plate’ is the Petri dish replicate (whose coding is repeated for each treatment), ‘n’ is the total number of seeds sown in each plate (n=100, always). There are 18 aggregate observations (i.e. plates), for a total of 1800 seeds.

#### Data arrangement 1 (multivariate format)

There are two factors, ‘temp’ and ‘plate’, and 12 response variables, ‘d1’ to ‘d7’, for the cumulative germination counts after the indicated number of days (d). The underscore symbol is used in place of the dot to separate decimals because the latter is not accepted in the variable name by the SAS software.

| temp | plate | n   | 0 | 1 | 2  | 3  | 3_5 | 4  | 4_5 | 5  | 5_5 | 6  | 6_5 | 7  |
|------|-------|-----|---|---|----|----|-----|----|-----|----|-----|----|-----|----|
| 20   | 1     | 100 | 0 | 0 | 5  | 69 | 88  | 92 | 93  | 93 | 94  | 95 | 95  | 95 |
| 20   | 2     | 100 | 0 | 0 | 3  | 50 | 79  | 88 | 90  | 91 | 92  | 92 | 92  | 92 |
| 20   | 3     | 100 | 0 | 0 | 4  | 54 | 81  | 94 | 95  | 96 | 96  | 96 | 96  | 96 |
| 20   | 4     | 100 | 0 | 0 | 3  | 56 | 77  | 85 | 88  | 91 | 91  | 91 | 91  | 91 |
| 20   | 5     | 100 | 0 | 0 | 5  | 60 | 72  | 83 | 86  | 87 | 87  | 87 | 87  | 87 |
| 20   | 6     | 100 | 0 | 0 | 5  | 57 | 82  | 92 | 93  | 94 | 94  | 94 | 94  | 94 |
| 30   | 1     | 100 | 0 | 0 | 8  | 73 | 90  | 93 | 93  | 95 | 95  | 95 | 95  | 95 |
| 30   | 2     | 100 | 0 | 0 | 9  | 82 | 93  | 94 | 95  | 96 | 96  | 96 | 96  | 96 |
| 30   | 3     | 100 | 0 | 0 | 9  | 77 | 89  | 92 | 95  | 96 | 96  | 96 | 96  | 96 |
| 30   | 4     | 100 | 0 | 0 | 10 | 75 | 81  | 86 | 88  | 91 | 91  | 92 | 92  | 93 |
| 30   | 5     | 100 | 0 | 0 | 10 | 71 | 86  | 93 | 95  | 95 | 95  | 95 | 95  | 95 |
| 30   | 6     | 100 | 0 | 0 | 11 | 83 | 88  | 92 | 92  | 93 | 93  | 93 | 93  | 93 |
| 40   | 1     | 100 | 0 | 0 | 16 | 76 | 86  | 88 | 88  | 90 | 90  | 92 | 92  | 92 |
| 40   | 2     | 100 | 0 | 0 | 15 | 84 | 88  | 91 | 91  | 92 | 92  | 92 | 92  | 92 |
| 40   | 3     | 100 | 0 | 0 | 20 | 83 | 91  | 92 | 92  | 93 | 93  | 94 | 94  | 95 |
| 40   | 4     | 100 | 0 | 0 | 22 | 77 | 85  | 88 | 89  | 92 | 92  | 92 | 92  | 92 |
| 40   | 5     | 100 | 0 | 0 | 20 | 74 | 86  | 92 | 92  | 95 | 95  | 95 | 95  | 96 |
| 40   | 6     | 100 | 0 | 0 | 20 | 76 | 86  | 92 | 92  | 92 | 93  | 94 | 94  | 95 |

### Data arrangement 2 (univariate format)

There are three factors, '**temp**', '**plate**' and '**time**' of observation (in days), and a single response variable, '**germ**', i.e. the cumulative germination count after the number of days indicated in the '**time**' column. In addition, a descriptive variable, '**stage**', is introduced to distinguish the lag period, at which imbibition and metabolism resumption take place, from the germination progress curve.

| <b>temp</b> | <b>plate</b> | <b>time</b> | <b>n</b> | <b>germ</b> | <b>stage</b> |
|-------------|--------------|-------------|----------|-------------|--------------|
| 20          | 1            | 0           | 100      | 0           | lag          |
| 20          | 2            | 0           | 100      | 0           | lag          |
| 20          | 3            | 0           | 100      | 0           | lag          |
| 20          | 4            | 0           | 100      | 0           | lag          |
| 20          | 5            | 0           | 100      | 0           | lag          |
| 20          | 6            | 0           | 100      | 0           | lag          |
| 30          | 1            | 0           | 100      | 0           | lag          |
| 30          | 2            | 0           | 100      | 0           | lag          |
| 30          | 3            | 0           | 100      | 0           | lag          |
| 30          | 4            | 0           | 100      | 0           | lag          |
| 30          | 5            | 0           | 100      | 0           | lag          |
| 30          | 6            | 0           | 100      | 0           | lag          |
| 40          | 1            | 0           | 100      | 0           | lag          |
| 40          | 2            | 0           | 100      | 0           | lag          |
| 40          | 3            | 0           | 100      | 0           | lag          |
| 40          | 4            | 0           | 100      | 0           | lag          |
| 40          | 5            | 0           | 100      | 0           | lag          |
| 40          | 6            | 0           | 100      | 0           | lag          |
| 20          | 1            | 1           | 100      | 0           | lag          |
| 20          | 2            | 1           | 100      | 0           | lag          |
| 20          | 3            | 1           | 100      | 0           | lag          |
| 20          | 4            | 1           | 100      | 0           | lag          |
| 20          | 5            | 1           | 100      | 0           | lag          |
| 20          | 6            | 1           | 100      | 0           | lag          |
| 30          | 1            | 1           | 100      | 0           | lag          |
| 30          | 2            | 1           | 100      | 0           | lag          |
| 30          | 3            | 1           | 100      | 0           | lag          |
| 30          | 4            | 1           | 100      | 0           | lag          |
| 30          | 5            | 1           | 100      | 0           | lag          |
| 30          | 6            | 1           | 100      | 0           | lag          |
| 40          | 1            | 1           | 100      | 0           | lag          |
| 40          | 2            | 1           | 100      | 0           | lag          |
| 40          | 3            | 1           | 100      | 0           | lag          |
| 40          | 4            | 1           | 100      | 0           | lag          |
| 40          | 5            | 1           | 100      | 0           | lag          |
| 40          | 6            | 1           | 100      | 0           | lag          |
| 20          | 1            | 2           | 100      | 5           | progress     |
| 20          | 2            | 2           | 100      | 3           | progress     |
| 20          | 3            | 2           | 100      | 4           | progress     |
| 20          | 4            | 2           | 100      | 3           | progress     |
| 20          | 5            | 2           | 100      | 5           | progress     |
| 20          | 6            | 2           | 100      | 5           | progress     |
| 30          | 1            | 2           | 100      | 8           | progress     |

|    |   |     |     |    |          |
|----|---|-----|-----|----|----------|
| 30 | 2 | 2   | 100 | 9  | progress |
| 30 | 3 | 2   | 100 | 9  | progress |
| 30 | 4 | 2   | 100 | 10 | progress |
| 30 | 5 | 2   | 100 | 10 | progress |
| 30 | 6 | 2   | 100 | 11 | progress |
| 40 | 1 | 2   | 100 | 16 | progress |
| 40 | 2 | 2   | 100 | 15 | progress |
| 40 | 3 | 2   | 100 | 20 | progress |
| 40 | 4 | 2   | 100 | 22 | progress |
| 40 | 5 | 2   | 100 | 20 | progress |
| 40 | 6 | 2   | 100 | 20 | progress |
| 20 | 1 | 3   | 100 | 69 | progress |
| 20 | 2 | 3   | 100 | 50 | progress |
| 20 | 3 | 3   | 100 | 54 | progress |
| 20 | 4 | 3   | 100 | 56 | progress |
| 20 | 5 | 3   | 100 | 60 | progress |
| 20 | 6 | 3   | 100 | 57 | progress |
| 30 | 1 | 3   | 100 | 73 | progress |
| 30 | 2 | 3   | 100 | 82 | progress |
| 30 | 3 | 3   | 100 | 77 | progress |
| 30 | 4 | 3   | 100 | 75 | progress |
| 30 | 5 | 3   | 100 | 71 | progress |
| 30 | 6 | 3   | 100 | 83 | progress |
| 40 | 1 | 3   | 100 | 76 | progress |
| 40 | 2 | 3   | 100 | 84 | progress |
| 40 | 3 | 3   | 100 | 83 | progress |
| 40 | 4 | 3   | 100 | 77 | progress |
| 40 | 5 | 3   | 100 | 74 | progress |
| 40 | 6 | 3   | 100 | 76 | progress |
| 20 | 1 | 3.5 | 100 | 88 | progress |
| 20 | 2 | 3.5 | 100 | 79 | progress |
| 20 | 3 | 3.5 | 100 | 81 | progress |
| 20 | 4 | 3.5 | 100 | 77 | progress |
| 20 | 5 | 3.5 | 100 | 72 | progress |
| 20 | 6 | 3.5 | 100 | 82 | progress |
| 30 | 1 | 3.5 | 100 | 90 | progress |
| 30 | 2 | 3.5 | 100 | 93 | progress |
| 30 | 3 | 3.5 | 100 | 89 | progress |
| 30 | 4 | 3.5 | 100 | 81 | progress |
| 30 | 5 | 3.5 | 100 | 86 | progress |
| 30 | 6 | 3.5 | 100 | 88 | progress |
| 40 | 1 | 3.5 | 100 | 86 | progress |
| 40 | 2 | 3.5 | 100 | 88 | progress |
| 40 | 3 | 3.5 | 100 | 91 | progress |
| 40 | 4 | 3.5 | 100 | 85 | progress |
| 40 | 5 | 3.5 | 100 | 86 | progress |
| 40 | 6 | 3.5 | 100 | 86 | progress |
| 20 | 1 | 4   | 100 | 92 | progress |
| 20 | 2 | 4   | 100 | 88 | progress |
| 20 | 3 | 4   | 100 | 94 | progress |
| 20 | 4 | 4   | 100 | 85 | progress |

|    |   |     |     |    |          |
|----|---|-----|-----|----|----------|
| 20 | 5 | 4   | 100 | 83 | progress |
| 20 | 6 | 4   | 100 | 92 | progress |
| 30 | 1 | 4   | 100 | 93 | progress |
| 30 | 2 | 4   | 100 | 94 | progress |
| 30 | 3 | 4   | 100 | 92 | progress |
| 30 | 4 | 4   | 100 | 86 | progress |
| 30 | 5 | 4   | 100 | 93 | progress |
| 30 | 6 | 4   | 100 | 92 | progress |
| 40 | 1 | 4   | 100 | 88 | progress |
| 40 | 2 | 4   | 100 | 91 | progress |
| 40 | 3 | 4   | 100 | 92 | progress |
| 40 | 4 | 4   | 100 | 88 | progress |
| 40 | 5 | 4   | 100 | 92 | progress |
| 40 | 6 | 4   | 100 | 92 | progress |
| 20 | 1 | 4.5 | 100 | 93 | progress |
| 20 | 2 | 4.5 | 100 | 90 | progress |
| 20 | 3 | 4.5 | 100 | 95 | progress |
| 20 | 4 | 4.5 | 100 | 88 | progress |
| 20 | 5 | 4.5 | 100 | 86 | progress |
| 20 | 6 | 4.5 | 100 | 93 | progress |
| 30 | 1 | 4.5 | 100 | 93 | progress |
| 30 | 2 | 4.5 | 100 | 95 | progress |
| 30 | 3 | 4.5 | 100 | 95 | progress |
| 30 | 4 | 4.5 | 100 | 88 | progress |
| 30 | 5 | 4.5 | 100 | 95 | progress |
| 30 | 6 | 4.5 | 100 | 92 | progress |
| 40 | 1 | 4.5 | 100 | 88 | progress |
| 40 | 2 | 4.5 | 100 | 91 | progress |
| 40 | 3 | 4.5 | 100 | 92 | progress |
| 40 | 4 | 4.5 | 100 | 89 | progress |
| 40 | 5 | 4.5 | 100 | 92 | progress |
| 40 | 6 | 4.5 | 100 | 92 | progress |
| 20 | 1 | 5   | 100 | 93 | progress |
| 20 | 2 | 5   | 100 | 91 | progress |
| 20 | 3 | 5   | 100 | 96 | progress |
| 20 | 4 | 5   | 100 | 91 | progress |
| 20 | 5 | 5   | 100 | 87 | progress |
| 20 | 6 | 5   | 100 | 94 | progress |
| 30 | 1 | 5   | 100 | 95 | progress |
| 30 | 2 | 5   | 100 | 96 | progress |
| 30 | 3 | 5   | 100 | 96 | progress |
| 30 | 4 | 5   | 100 | 91 | progress |
| 30 | 5 | 5   | 100 | 95 | progress |
| 30 | 6 | 5   | 100 | 93 | progress |
| 40 | 1 | 5   | 100 | 90 | progress |
| 40 | 2 | 5   | 100 | 92 | progress |
| 40 | 3 | 5   | 100 | 93 | progress |
| 40 | 4 | 5   | 100 | 92 | progress |
| 40 | 5 | 5   | 100 | 95 | progress |
| 40 | 6 | 5   | 100 | 92 | progress |
| 20 | 1 | 5.5 | 100 | 94 | progress |

|    |   |     |     |    |          |
|----|---|-----|-----|----|----------|
| 20 | 2 | 5.5 | 100 | 92 | progress |
| 20 | 3 | 5.5 | 100 | 96 | progress |
| 20 | 4 | 5.5 | 100 | 91 | progress |
| 20 | 5 | 5.5 | 100 | 87 | progress |
| 20 | 6 | 5.5 | 100 | 94 | progress |
| 30 | 1 | 5.5 | 100 | 95 | progress |
| 30 | 2 | 5.5 | 100 | 96 | progress |
| 30 | 3 | 5.5 | 100 | 96 | progress |
| 30 | 4 | 5.5 | 100 | 91 | progress |
| 30 | 5 | 5.5 | 100 | 95 | progress |
| 30 | 6 | 5.5 | 100 | 93 | progress |
| 40 | 1 | 5.5 | 100 | 90 | progress |
| 40 | 2 | 5.5 | 100 | 92 | progress |
| 40 | 3 | 5.5 | 100 | 93 | progress |
| 40 | 4 | 5.5 | 100 | 92 | progress |
| 40 | 5 | 5.5 | 100 | 95 | progress |
| 40 | 6 | 5.5 | 100 | 93 | progress |
| 20 | 1 | 6   | 100 | 95 | progress |
| 20 | 2 | 6   | 100 | 92 | progress |
| 20 | 3 | 6   | 100 | 96 | progress |
| 20 | 4 | 6   | 100 | 91 | progress |
| 20 | 5 | 6   | 100 | 87 | progress |
| 20 | 6 | 6   | 100 | 94 | progress |
| 30 | 1 | 6   | 100 | 95 | progress |
| 30 | 2 | 6   | 100 | 96 | progress |
| 30 | 3 | 6   | 100 | 96 | progress |
| 30 | 4 | 6   | 100 | 92 | progress |
| 30 | 5 | 6   | 100 | 95 | progress |
| 30 | 6 | 6   | 100 | 93 | progress |
| 40 | 1 | 6   | 100 | 92 | progress |
| 40 | 2 | 6   | 100 | 92 | progress |
| 40 | 3 | 6   | 100 | 94 | progress |
| 40 | 4 | 6   | 100 | 92 | progress |
| 40 | 5 | 6   | 100 | 95 | progress |
| 40 | 6 | 6   | 100 | 94 | progress |
| 20 | 1 | 6.5 | 100 | 95 | progress |
| 20 | 2 | 6.5 | 100 | 92 | progress |
| 20 | 3 | 6.5 | 100 | 96 | progress |
| 20 | 4 | 6.5 | 100 | 91 | progress |
| 20 | 5 | 6.5 | 100 | 87 | progress |
| 20 | 6 | 6.5 | 100 | 94 | progress |
| 30 | 1 | 6.5 | 100 | 95 | progress |
| 30 | 2 | 6.5 | 100 | 96 | progress |
| 30 | 3 | 6.5 | 100 | 96 | progress |
| 30 | 4 | 6.5 | 100 | 92 | progress |
| 30 | 5 | 6.5 | 100 | 95 | progress |
| 30 | 6 | 6.5 | 100 | 93 | progress |
| 40 | 1 | 6.5 | 100 | 92 | progress |
| 40 | 2 | 6.5 | 100 | 92 | progress |
| 40 | 3 | 6.5 | 100 | 94 | progress |
| 40 | 4 | 6.5 | 100 | 92 | progress |

|    |   |     |     |    |          |
|----|---|-----|-----|----|----------|
| 40 | 5 | 6.5 | 100 | 95 | progress |
| 40 | 6 | 6.5 | 100 | 94 | progress |
| 20 | 1 | 7   | 100 | 95 | progress |
| 20 | 2 | 7   | 100 | 92 | progress |
| 20 | 3 | 7   | 100 | 96 | progress |
| 20 | 4 | 7   | 100 | 91 | progress |
| 20 | 5 | 7   | 100 | 87 | progress |
| 20 | 6 | 7   | 100 | 94 | progress |
| 30 | 1 | 7   | 100 | 95 | progress |
| 30 | 2 | 7   | 100 | 96 | progress |
| 30 | 3 | 7   | 100 | 96 | progress |
| 30 | 4 | 7   | 100 | 93 | progress |
| 30 | 5 | 7   | 100 | 95 | progress |
| 30 | 6 | 7   | 100 | 93 | progress |
| 40 | 1 | 7   | 100 | 92 | progress |
| 40 | 2 | 7   | 100 | 92 | progress |
| 40 | 3 | 7   | 100 | 95 | progress |
| 40 | 4 | 7   | 100 | 92 | progress |
| 40 | 5 | 7   | 100 | 96 | progress |
| 40 | 6 | 7   | 100 | 95 | progress |

## References

Piacco R. (1954). Ricerche sui metodi di analisi delle sementi di riso (*Oryza sativa* L.) nei riguardi della facoltà germinativa. *Annali della Stazione Sperimentale di Riscoltura e delle Colture Irrigue di Vercelli* 2: 111-179.
